# Supplementary material
Source: PubMed Central journal article supplement (PMC4133931)
Supplement: NIHMS597546-supplement-Supp_Table.pdf [file NIHMS597546-supplement-Supp_Table.pdf]

Supplementary table 1:  
DHPLC analysis of PTK2 genomic sequence

| Ex/Int | Variant       | Aminoacid consequence | Splice site predictor | note                |
|--------|---------------|-----------------------|-----------------------|---------------------|
| 6      | c.491-66 T>C  |                       | No consequence        | Found in 2 patients |
| 8      | c.594-20 C>T  |                       | No consequence        | Found in 6 patients |
| 22     | c.1947 T>C    | Pro 649 Pro           | No consequence        | Found in 1 patient  |
| 28     | c.2563-49 G>T |                       | No consequence        | Found in 2 patients |
| 29     | c.2652 T>C    | His 884 His           | No consequence        | Found in 1 patient  |

Supplementary table 2:  
dHPLC analysis of THOC2 genomic sequence

| Ex/Int | Variant       | Aminoacid consequence | Splice site predictor | note                |
|--------|---------------|-----------------------|-----------------------|---------------------|
| 2      | c.71-91 T>G   | none                  | No consequence        | Found in 1 patients |
| 22     | c.2317-47 A>G | none                  | No consequence        | Found in 6 patients |
| 23     | c.2482-49 G>A | none                  | No consequence        | Found in 4 patients |

---

Supplementary table 2:  
dHPLC analysis of THOC2 genomic sequence

---

| Ex/Int | Variant       | Aminoacid consequence | Splice site predictor | note                |
|--------|---------------|-----------------------|-----------------------|---------------------|
| 2      | c.71-91 T>G   | none                  | No consequence        | Found in 1 patients |
| 22     | c.2317-47 A>G | none                  | No consequence        | Found in 6 patients |
| 23     | c.2482-49 G>A | none                  | No consequence        | Found in 4 patients |
